# Supplementary material for: Hunger neurons drive feeding through a sustained, positive reinforcement signal
Source: eLife journal article supplement (doi:10.7554/elife.18640), 2016-08-24
Supplement: supp [file elife-18640-supp-v1.zip]

Archive with 3 entries (3 files):
- elife_poa_e18640_Figure_4_figure_supplement_1.pdf
- elife_poa_e18640_Figure_1_figure_supplement_1.pdf
- elife_poa_e18640_Figure_6_figure_supplement_1.pdf
