# Supplementary material for: Hunger neurons drive feeding through a sustained, positive reinforcement signal
Source: eLife journal article supplement (doi:10.7554/elife.18640), 2016-08-24
Supplement: supp [file elife-18640-supp-v1.zip]

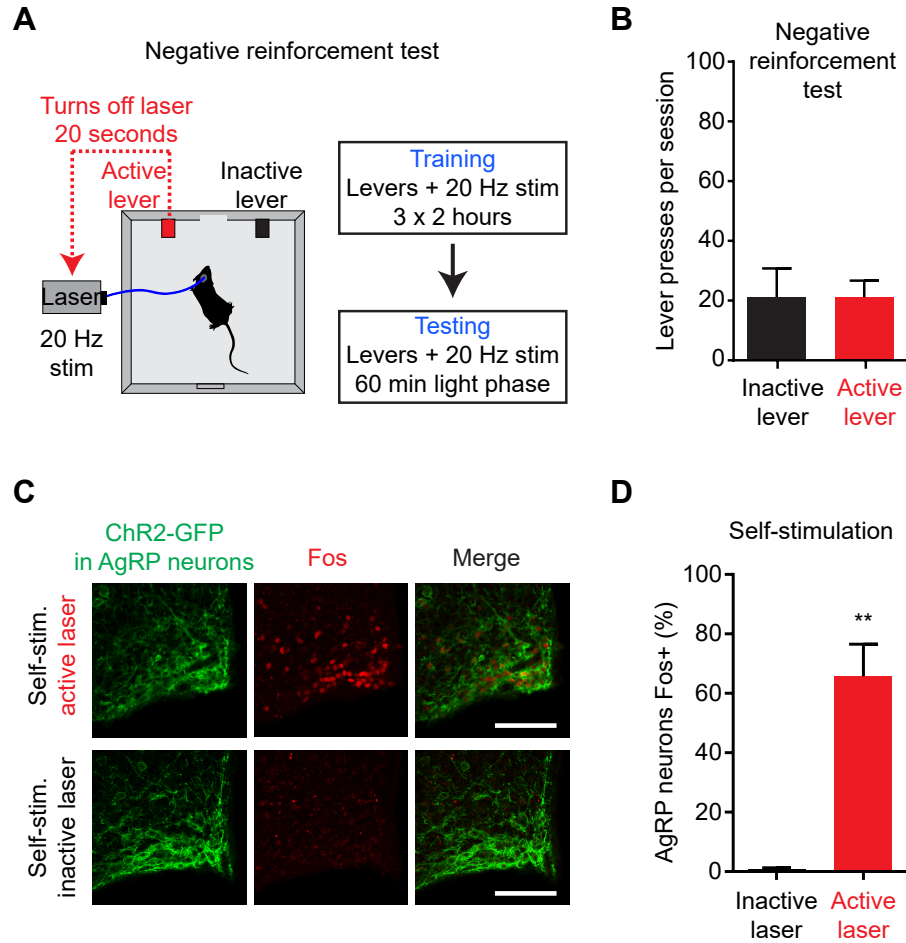

**Figure 6 - Figure Supplement 1.** AgRP neurons support positive, but not negative, reinforcement. (A) Schematic of the negative reinforcement protocol that tests whether animals will lever press to shut off AgRP neuron activity. (B) Number of presses for the active and inactive lever in a 60 minute negative reinforcement test (n=6). (C) Induction of Fos expression in AgRP neurons of mice that are allowed to self-stimulate by lever pressing (top), but not in mice in which the lever has been disconnected from the laser (bottom). (D) Quantification of the percentage of AgRP neurons that express Fos in each group (n=3). Asterisks indicate a significant difference in Fos expression between the two groups by an unpaired, two-tailed t-test. (\*\*0.001<p≤0.01).
