# Supplementary material for: Hunger neurons drive feeding through a sustained, positive reinforcement signal
Source: eLife journal article supplement (doi:10.7554/elife.18640), 2016-08-24
Supplement: supp [file elife-18640-supp-v1.zip]

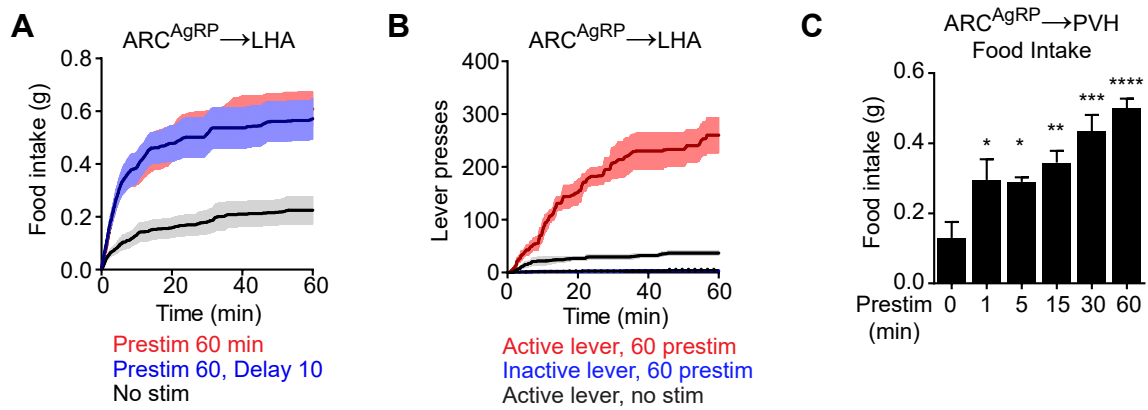

**Figure 4 - Figure Supplement 1. Prestimulation of specific AgRP neuron projections promotes feeding.** (A) Plots of cumulative food intake for prestimulation AgRP( $ARC \rightarrow LHA$ ) projections. Filled area indicates SEM ( $n=6$ ). (B) Plots of cumulative lever presses for prestimulation of AgRP( $ARC \rightarrow LHA$ ) projections. Filled area indicates SEM ( $n=3$ ). (C) Food intake evoked by prestimulation of AgRP( $ARC \rightarrow PVH$ ) projections of varied duration ( $n=4$ ). Asterisks indicate significance levels for comparison to no prestimulation adjusted with Holm-Sidak's correction for multiple comparisons (\*\*\*\* $p \leq 0.0001$ , \*\*\* $0.0001 < p \leq 0.001$ , \*\* $0.001 < p \leq 0.01$ , \* $0.01 < p \leq 0.05$ ).
